# Supplementary material for: Single cell analysis revealed SFRP2 cancer associated fibroblasts drive tumorigenesis in head and neck squamous cell carcinoma
Source: Springer Nature journal article supplement (doi:10.1038/s41698-024-00716-5), 2024-10-09
Supplement: 41698_2024_716_MOESM1_ESM.pdf [file 41698_2024_716_MOESM1_ESM.pdf]

## Supplementary materials

### **SFRP2 Cancer Associated Fibroblasts Drive Tumorigenesis in Head and Neck Squamous Cell Carcinoma**

**Supplementary Table 1**

| Dataset   | Total samples | Matched samples<br>(Primary vs Metastasis) | Metastasis samples |
|-----------|---------------|--------------------------------------------|--------------------|
| GSE181919 | 23            | 8                                          | 4                  |
| GSE188737 | 14            | 14                                         | 7                  |
| GSE234933 | 52            | 0                                          | 12                 |
| GSE173468 | 15            | 2                                          | 1                  |
| GSE164690 | 18            | 0                                          | 0                  |
| GSE215403 | 12            | 0                                          | 0                  |
| GSE181300 | 8 (paraffin)  | 0                                          | 0                  |

# Supplementary Figure1

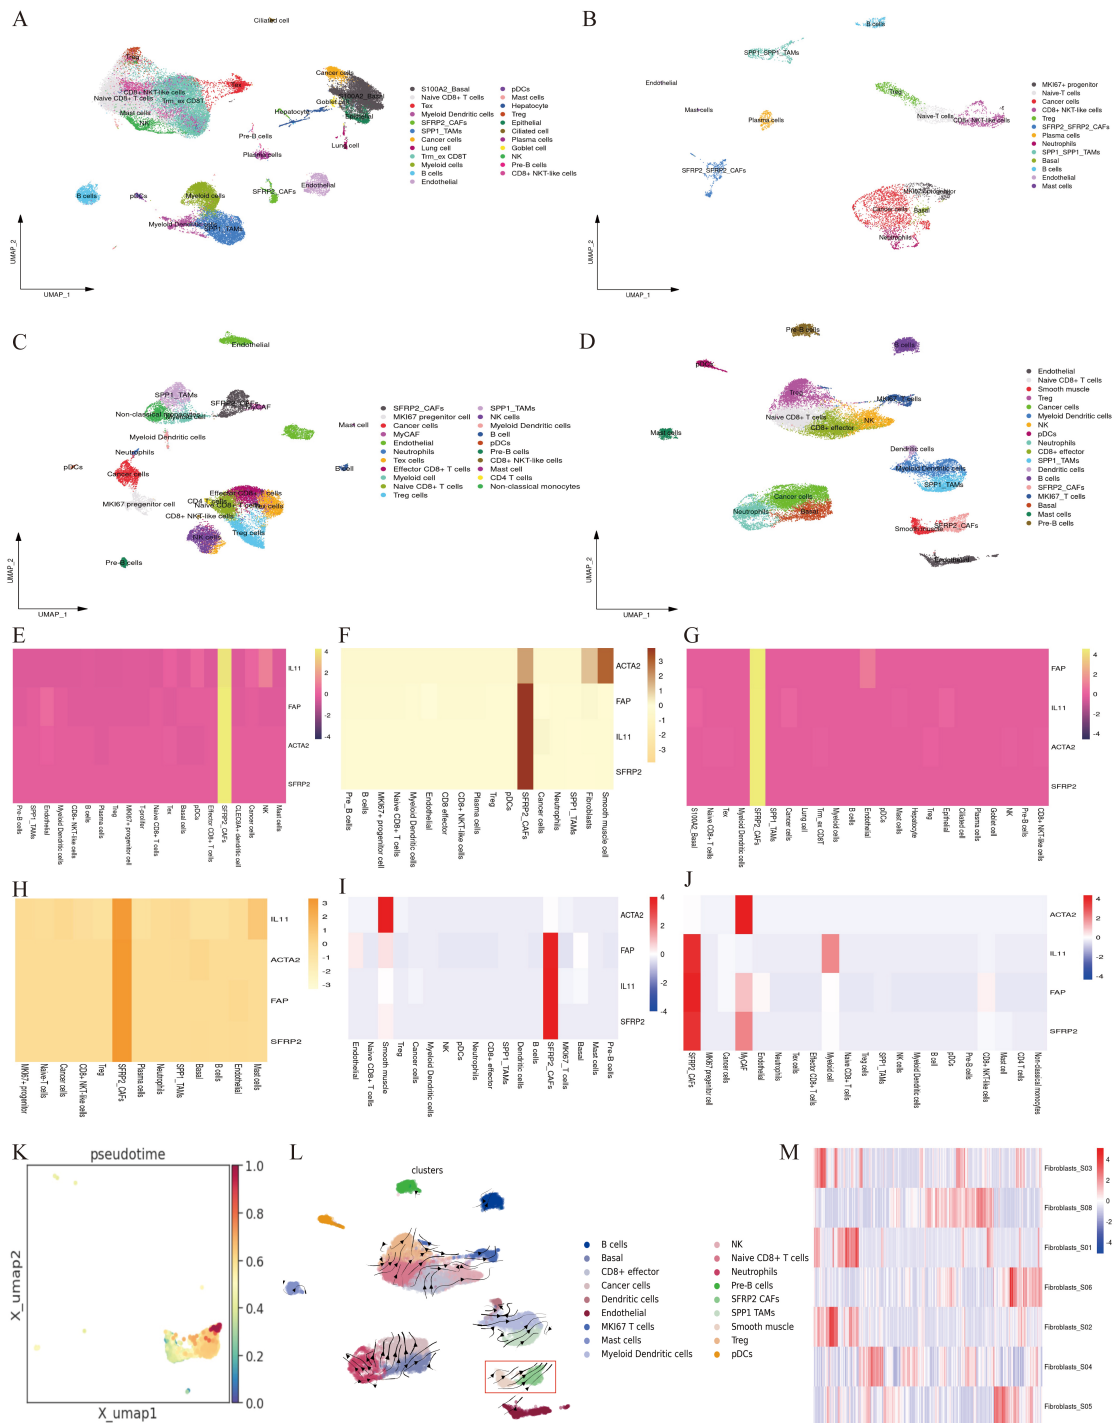

## Supplementary Figure1 legend

**A)** In the study of single-cell objects from advanced head and neck squamous cell carcinoma (HNSCC) GSE234933, 23 distinct cell types were identified. **B)** In the study of single-cell objects from advanced head and neck squamous cell carcinoma (HNSCC) GSE173468, 13 distinct cell types were identified. **C)** In the study of single-cell objects from advanced head and neck squamous cell carcinoma (HNSCC) GSE164690, 21 distinct cell types were identified. **D)** In the study of single-cell objects from advanced head and neck squamous cell carcinoma (HNSCC) GSE215403, 18 distinct cell types were identified. **E-J)** Heatmaps depict the expression of four markers, namely

SFRP2, FAP, ACTA2, and IL11, across the datasets GSE18191, GSE188737, GSE234933, GSE173468, GSE215403 and GSE164690. **K)** UMAP representation highlighting the starting cell (blue) with the lowest SFRP2 expression, and the terminal cells (red) as predicted by Palantir in GSE215403. **L)** Velocities derived from the dynamical model for GSE215403 HNSCC single cell dataset are visualized as streamlines in a UMAP-based embedding. **M)** Heatmap depict the abundance of seven Fibroblasts subtypes in meta cohort.





### Supplementary Figure2 legend

**A-B)** In GSE173468, cell communication revealed that SFRP2\_CAFs and SPP1\_TAMs play a dominant role in the tumor microenvironment of HNSCC metastases (the "communication score" between SFRP2\_CAFs and SPP1\_TAMs = 21, higher than the "communication score" between any other pair of cells). The MIF-CD74 ligand-receptor interaction predominated in this cell communication. **C-D)** In GSE234933, cell communication revealed that SFRP2\_CAFs and SPP1\_TAMs play a dominant role in the tumor microenvironment of HNSCC metastases (the "communication score" between SFRP2\_CAFs and SPP1\_TAMs = 15, higher than the "communication score" between any other pair of cells). The MIF-CD74 ligand-receptor interaction predominated in this cell communication. **E-F)** In GSE164690, HNSCC single cell database with no metastatic lesions, cell communication revealed that SFRP2\_CAFs crosstalk with Endothelial play a dominant role in the tumor microenvironment of HNSCC. The interaction facilitated by the MIF-CD74 ligand-receptor pair remains a discernible feature within the crosstalk between SFRP2\_CAFs and SPP1\_TAMs. **G-H)** In GSE215403, another no metastatic lesions, cell communication revealed that SFRP2\_CAFs crosstalk with Endothelial still play a dominant role in the tumor microenvironment of HNSCC. The MIF-CD74 ligand-receptor interaction continues to be observed within the crosstalk between SFRP2-CAFs and SPP1-TAMs. **I)** Beeswarm plot of the distribution of log fold change across HPV negative and HPV positive in neighborhoods containing cells from different cell type clusters. Differential abundance neighborhoods at FDR 10% are colored. **J)** The correlation ( $R = 0.983$ ,  $p < 2.2e-16$ ) between HPV negative SFRP2\_CAFs genes' expression and HPV positive SFRP2\_CAFs genes' expression. **K)** The correlation ( $R = 0.996$ ,  $p < 2.2e-16$ ) between HPV negative SPP1\_TAMs genes' expression and HPV positive SPP1\_TAMs genes' expression.

## Supplementary Figure3

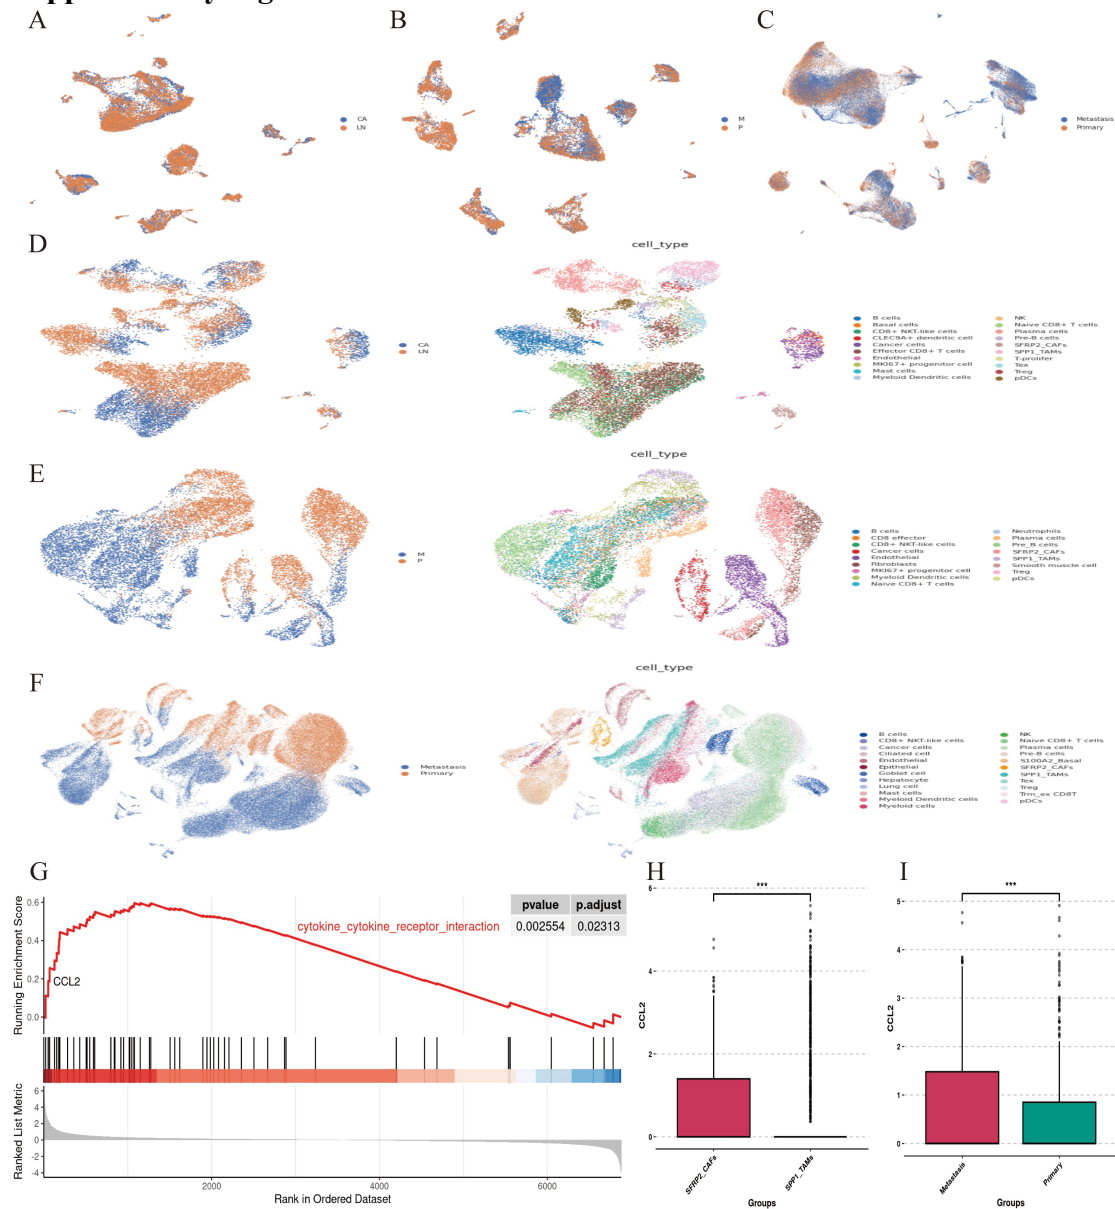

### Supplementary Figure3 legend

**A-C)** The single-cell datasets GSE181919, GSE188737, and GSE234933, after batch effect removal, show that CA (primary site) and LN (lymph node metastatic site), as well as P (primary site) and M (metastatic site), Metastasis and Primary cannot be distinctly separated. **D-F)** The single-cell datasets GSE181919, GSE188737, and GSE234933, after fine-tuned application, primary and metastatic site can be well separated. **G)** CCL2 exhibited a significant positive regulatory effect of cytokine-cytokine-receptor signaling pathways in SFRP2\_CAFs, GSE234933,  $p = 0.002554$ . **H)** CCL2 expression in GSE234933, focusing on SFRP2\_CAFs and SPP1\_TAMs ( $* < 0.05$ ;  $** < 0.01$ ;  $*** < 0.001$ ,  $**** < 0.0001$ ). **I)** CCL2 expression in GSE234933, focusing on Metastasis and Primary ( $* < 0.05$ ;  $** < 0.01$ ;  $*** < 0.001$ ,  $**** < 0.0001$ ).

## Supplementary Figure4

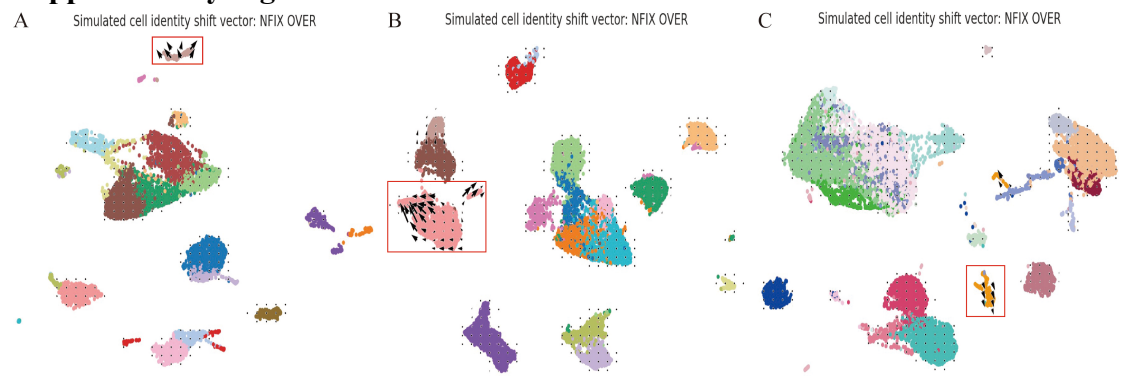

### Supplementary Figure4 legend

A-C) CellOracle simulation cell-state transitions in the NFIX over expression simulation; The resulting cell-state transition vectors were summarized and projected onto a force-directed graph; red box; left to right; GSE181919, GSE188737 and GSE234933.

Supplementary Western blot Figure\_1

Figure4A

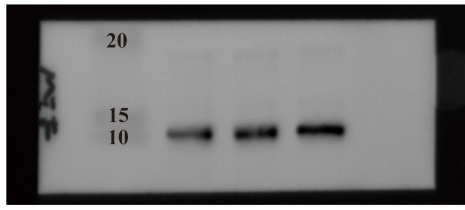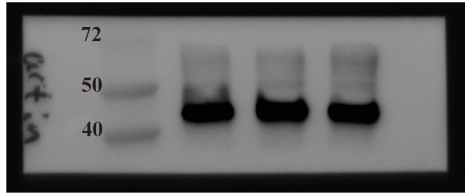

|      |   |   |   |
|------|---|---|---|
| TAMs | + | + | + |
| CAFs | - | + | + |
| CCL2 | - | - | + |

Figure4O

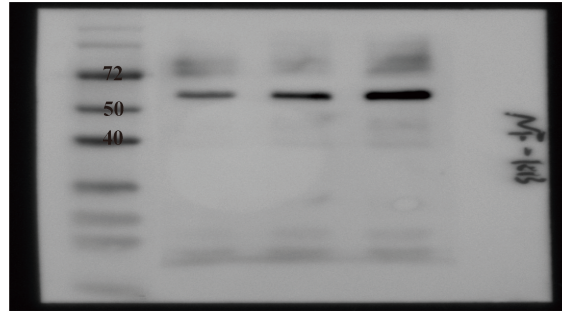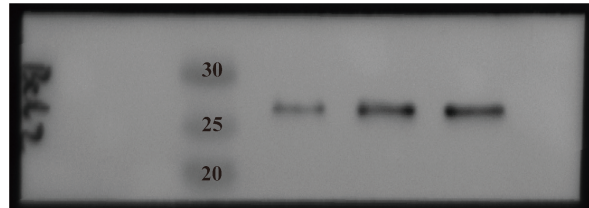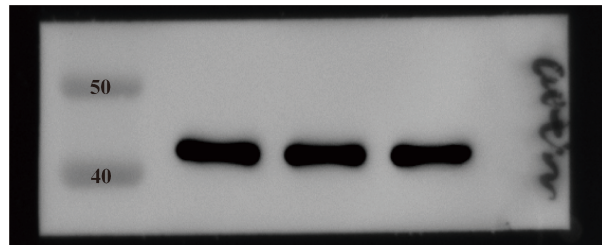

|      |   |   |   |
|------|---|---|---|
| TAMs | + | + | + |
| CAFs | - | + | + |
| CCL2 | - | - | + |

Supplementary Western blot Figure\_2  
Figure5B

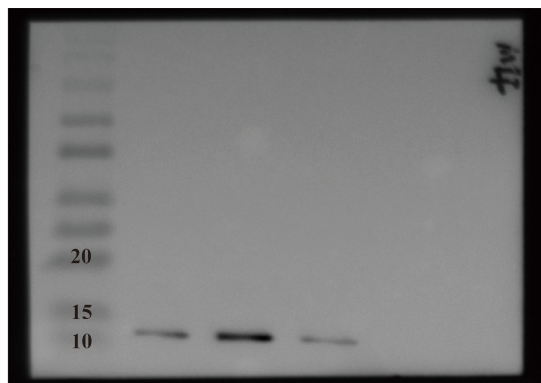

Figure6N

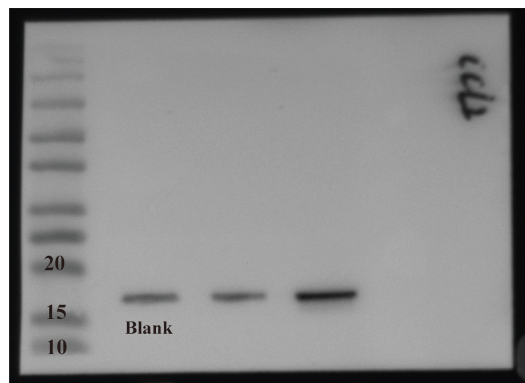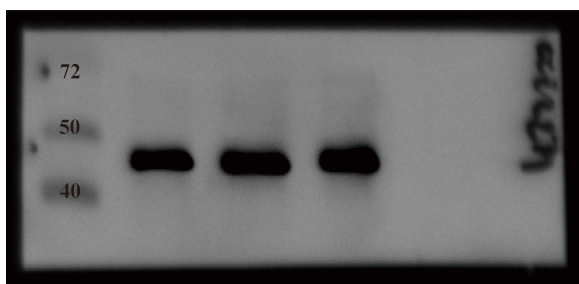

|      |   |   |   |
|------|---|---|---|
| TAMs | + | + | + |
| CAFs | - | + | + |
| MCE  | - | - | + |

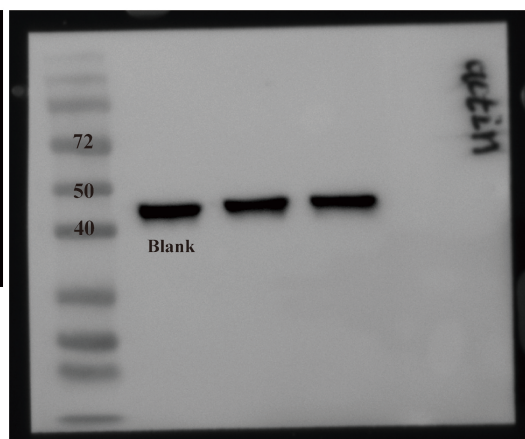

|        |   |   |
|--------|---|---|
| CAFs   | + | + |
| siNFIX | + | - |
